# Supplementary material
Source: MDPI journal article supplement (https://www.mdpi.com/2673-4826/3/3/23)
Supplement: s1 [file s1]

Archive with 1 entries (1 files):
- electricity-1812537-supplementary.pdf
